# Supplementary material
Source: PubMed Central journal article supplement (PMC2743246)

MALDI-TOF MS spectra from Fn lipid A isolated after growth at A: 25°C; and B: 37°C.

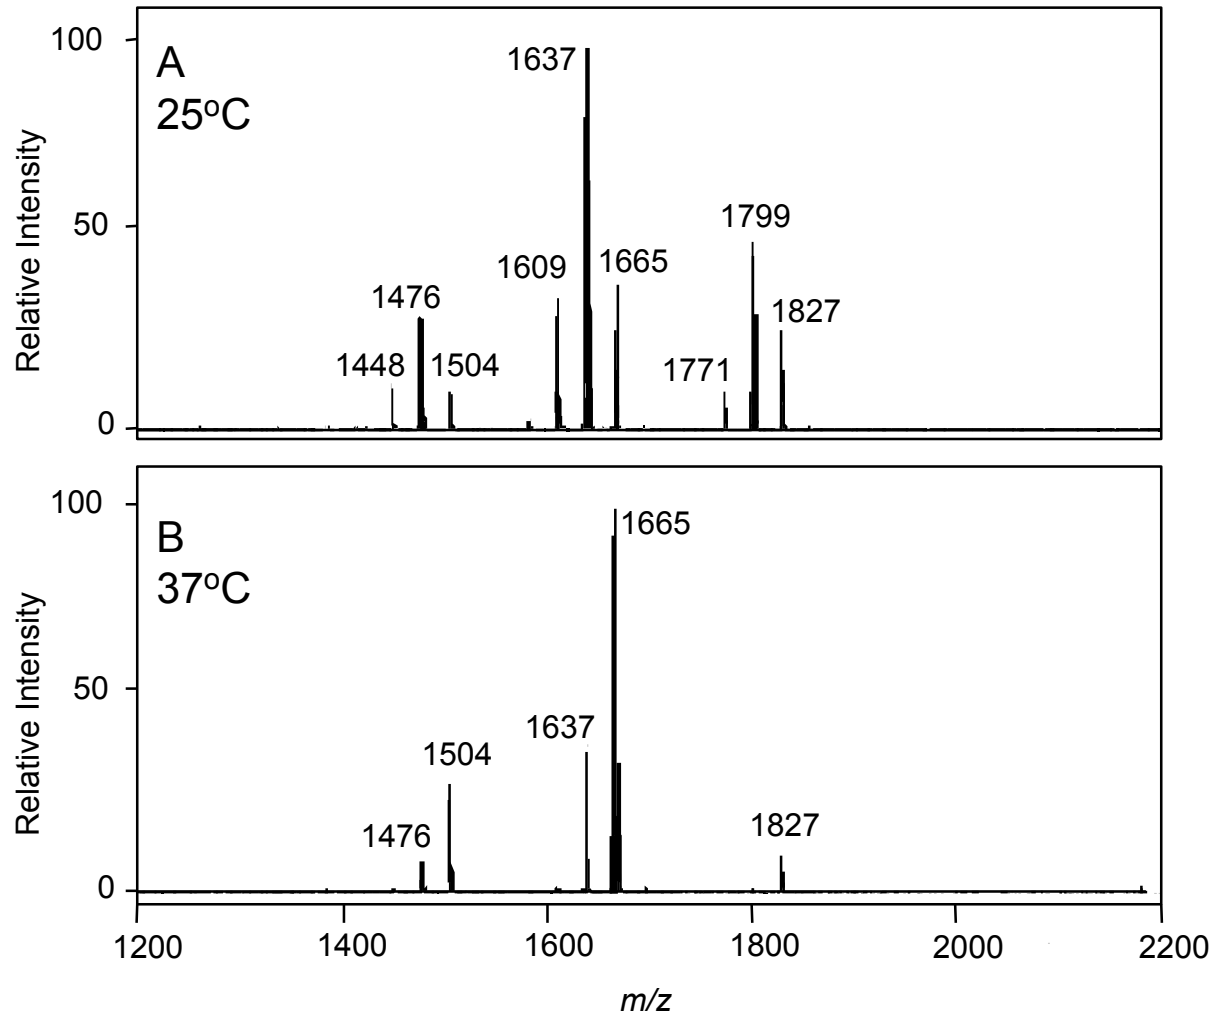

Supplement: NIHMS125164-supplement-MALDI-TOF_Figure.pdf [file NIHMS125164-supplement-MALDI-TOF_Figure.pdf]
